# Supplementary material
Source: HighWire-hosted journal article supplement (https://jech.bmj.com/content/76/10/841)
Supplement: inline-supplementary-material-1 [file inline-supplementary-material-1.pdf]

| 4 digit SOC Description                                  | Mutambudzi et al.      | equ Nafilyan et al.            | 2021 key worker groups |
|----------------------------------------------------------|------------------------|--------------------------------|------------------------|
| 1115 Chief executives and senior officials               | Non essential          | Non essential                  |                        |
| 1116 Elected officers and representatives                | Non essential          | Non essential                  |                        |
| 1121 Production managers and directors in manufactu      | Non essential          | Non essential                  |                        |
| 1122 Production managers and directors in constructio    | Non essential          | Non essential                  |                        |
| 1123 Production managers and directors in mining and     | Non essential          | Non essential                  |                        |
| 1131 Financial managers and directors                    | Non essential          | Non essential                  |                        |
| 1132 Marketing and sales directors                       | Non essential          | Non essential                  |                        |
| 1133 Purchasing managers and directors                   | Non essential          | Non essential                  |                        |
| 1134 Advertising and public relations directors          | Non essential          | Non essential                  |                        |
| 1135 Human resource managers and directors               | Non essential          | Non essential                  |                        |
| 1136 Information technology and telecommunications       | Non essential          | Non essential                  |                        |
| 1139 Functional managers and directors n.e.c.            | Non essential          | Non essential                  |                        |
| 1150 Financial institution managers and directors        | Non essential          | Non essential                  |                        |
| 1161 Managers and directors in transport and distribut   | Non essential          | Other transport workers        |                        |
| 1162 Managers and directors in storage and warehousi     | other essential worker | Food retail and distribution   |                        |
| 1171 Officers in armed forces                            | other essential worker | Non essential                  |                        |
| 1172 Senior police officers                              | other essential worker | Police and protective services |                        |
| 1173 Senior officers in fire, ambulance, prison and rela | other essential worker | Police and protective services |                        |
| 1181 Health services and public health managers and d    | Healthcare Workers     | Health associate professionals |                        |
| 1184 Social services managers and directors              | Social and Educational | Social care                    |                        |
| 1190 Managers and directors in retail and wholesale      | Other essential worker | Food retail and distribution   |                        |
| 1211 Managers and proprietors in agriculture and hort    | other essential worker | Food production                |                        |
| 1213 Managers and proprietors in forestry, fishing and   | other essential worker | Food production                |                        |
| 1221 Hotel and accommodation managers and proprie        | Non essential          | Non essential                  |                        |
| 1223 Restaurant and catering establishment managers      | Non essential          | Non essential                  |                        |
| 1224 Publicans and managers of licensed premises         | Non essential          | Non essential                  |                        |
| 1225 Leisure and sports managers                         | Non essential          | Non essential                  |                        |
| 1226 Travel agency managers and proprietors              | Non essential          | Non essential                  |                        |
| 1241 Health care practice managers                       | Non essential          | Health associate professionals |                        |
| 1242 Residential, day and domiciliary care managers a    | Non essential          | Social care                    |                        |
| 1251 Property, housing and estate managers               | Non essential          | Non essential                  |                        |
| 1252 Garage managers and proprietors                     | Non essential          | Non essential                  |                        |

|      |                                                             |                    |                                |
|------|-------------------------------------------------------------|--------------------|--------------------------------|
| 1253 | Hairdressing and beauty salon managers and proprietors      | Non essential      | Non essential                  |
| 1254 | Shopkeepers and proprietors – wholesale and retail          | Non essential      | Food retail and distribution   |
| 1255 | Waste disposal and environmental services managers          | Non essential      | Non essential                  |
| 1259 | Managers and proprietors in other services n.e.c.           | Non essential      | Non essential                  |
| 2111 | Chemical scientists                                         | Non essential      | Non essential                  |
| 2112 | Biological scientists and biochemists                       | Non essential      | Non essential                  |
| 2113 | Physical scientists                                         | Non essential      | Non essential                  |
| 2114 | Social and humanities scientists                            | Non essential      | Non essential                  |
| 2119 | Natural and social science professionals n.e.c.             | Non essential      | Non essential                  |
| 2121 | Civil engineers                                             | Non essential      | Non essential                  |
| 2122 | Mechanical engineers                                        | Non essential      | Non essential                  |
| 2123 | Electrical engineers                                        | Non essential      | Non essential                  |
| 2124 | Electronics engineers                                       | Non essential      | Non essential                  |
| 2126 | Design and development engineers                            | Non essential      | Non essential                  |
| 2127 | Production and process engineers                            | Non essential      | Non essential                  |
| 2129 | Engineering professionals n.e.c.                            | Non essential      | Non essential                  |
| 2133 | IT specialist managers                                      | Non essential      | Non essential                  |
| 2134 | IT project and programme managers                           | Non essential      | Non essential                  |
| 2135 | IT business analysts, architects and systems designers      | Non essential      | Non essential                  |
| 2136 | Programmers and software development professionals          | Non essential      | Non essential                  |
| 2137 | Web design and development professionals                    | Non essential      | Non essential                  |
| 2139 | Information technology and telecommunications professionals | Non essential      | Non essential                  |
| 2141 | Conservation professionals                                  | Non essential      | Non essential                  |
| 2142 | Environment professionals                                   | Non essential      | Non essential                  |
| 2150 | Air traffic controllers                                     | Non essential      | Non essential                  |
| 2211 | Medical practitioners                                       | Healthcare Workers | Health professionals           |
| 2212 | Psychologists                                               | Healthcare Workers | Health professionals           |
| 2213 | Pharmacists                                                 | Healthcare Workers | Health professionals           |
| 2214 | Ophthalmic opticians                                        | Healthcare Workers | Health associate professionals |
| 2215 | Dental practitioners                                        | Healthcare Workers | Health associate professionals |
| 2216 | Veterinarians                                               | Non essential      | Non essential                  |
| 2217 | Medical radiographers                                       | Non essential      | Health associate professionals |
| 2218 | Podiatrists                                                 | Non essential      | Health associate professionals |

|                                                              |                        |                                |
|--------------------------------------------------------------|------------------------|--------------------------------|
| 2219 Health professionals n.e.c.                             | Non essential          | Health associate professionals |
| 2221 Physiotherapists                                        | Non essential          | Health associate professionals |
| 2222 Occupational therapists                                 | Non essential          | Health associate professionals |
| 2223 Speech and language therapists                          | Non essential          | Health associate professionals |
| 2229 Therapy professionals n.e.c.                            | Non essential          | Non essential                  |
| 2231 Nurses                                                  | Healthcare Workers     | Health associate professionals |
| 2232 Midwives                                                | Healthcare Workers     | Health associate professionals |
| 2311 Higher education teaching professionals                 | Non essential          | Education                      |
| 2312 Further education teaching professionals                | Non essential          | Education                      |
| 2314 Secondary education teaching professionals              | Social and Educational | Education                      |
| 2315 Primary and nursery education teaching professionals    | Social and Educational | Education                      |
| 2316 Special needs education teaching professionals          | Social and Educational | Education                      |
| 2317 Senior professionals of educational establishments      | Non essential          | Education                      |
| 2318 Education advisers and school inspectors                | Non essential          | Education                      |
| 2319 Teaching and other educational professionals n.e.c.     | Non essential          | Education                      |
| 2412 Barristers and judges                                   | Non essential          | Non essential                  |
| 2413 Solicitors                                              | Non essential          | Non essential                  |
| 2419 Legal professionals n.e.c.                              | Non essential          | Non essential                  |
| 2421 Chartered and certified accountants                     | Non essential          | Non essential                  |
| 2423 Management consultants and business analysts            | Non essential          | Non essential                  |
| 2424 Business and financial project management professionals | Non essential          | Non essential                  |
| 2425 Actuaries, economists and statisticians                 | Non essential          | Non essential                  |
| 2426 Business and related research professionals             | Non essential          | Non essential                  |
| 2429 Business, research and administrative professionals     | Non essential          | Non essential                  |
| 2431 Architects                                              | Non essential          | Non essential                  |
| 2432 Town planning officers                                  | Non essential          | Non essential                  |
| 2433 Quantity surveyors                                      | Non essential          | Non essential                  |
| 2434 Chartered surveyors                                     | Non essential          | Non essential                  |
| 2435 Chartered architectural technologists                   | Non essential          | Non essential                  |
| 2436 Construction project managers and related professionals | Non essential          | Non essential                  |
| 2442 Social workers                                          | Social and Educational | Social care                    |
| 2443 Probation officers                                      | Other essential worker | Non essential                  |
| 2444 Clergy                                                  | Social and Educational | Social care                    |

|                                                        |                        |                                |
|--------------------------------------------------------|------------------------|--------------------------------|
| 2449 Welfare professionals n.e.c.                      | Social and Educational | Social care                    |
| 2451 Librarians                                        | Non essential          | Non essential                  |
| 2452 Archivists and curators                           | Non essential          | Non essential                  |
| 2461 Quality control and planning engineers            | Non essential          | Non essential                  |
| 2462 Quality assurance and regulatory professionals    | Non essential          | Non essential                  |
| 2463 Environmental health professionals                | Non essential          | Non essential                  |
| 2471 Journalists, newspaper and periodical editors     | Non essential          | Non essential                  |
| 2472 Public relations professionals                    | Non essential          | Non essential                  |
| 2473 Advertising accounts managers and creative direc  | Non essential          | Non essential                  |
| 3111 Laboratory technicians                            | Non essential          | Non essential                  |
| 3112 Electrical and electronics technicians            | Non essential          | Non essential                  |
| 3113 Engineering technicians                           | Non essential          | Non essential                  |
| 3114 Building and civil engineering technicians        | Non essential          | Non essential                  |
| 3115 Quality assurance technicians                     | Non essential          | Non essential                  |
| 3116 Planning, process and production technicians      | Non essential          | Non essential                  |
| 3119 Science, engineering and production technicians r | Non essential          | Non essential                  |
| 3121 Architectural and town planning technicians       | Non essential          | Non essential                  |
| 3122 Draughtspersons                                   | Non essential          | Non essential                  |
| 3131 IT operations technicians                         | Non essential          | Non essential                  |
| 3132 IT user support technicians                       | Non essential          | Non essential                  |
| 3213 Paramedics                                        | Healthcare Workers     | Health associate professionals |
| 3216 Dispensing opticians                              | Healthcare Workers     | Health associate professionals |
| 3217 Pharmaceutical technicians                        | Healthcare Workers     | Health associate professionals |
| 3218 Medical and dental technicians                    | Healthcare Workers     | Health associate professionals |
| 3219 Health associate professionals n.e.c.             | Healthcare Workers     | Health associate professionals |
| 3231 Youth and community workers                       | Social and Educational | Social care                    |
| 3233 Child and early years officers                    | Social and Educational | Workers                        |
| 3234 Housing officers                                  | Social and Educational | Social care                    |
| 3235 Counsellors                                       | Social and Educational | Workers                        |
| 3239 Welfare and housing associate professionals n.e.c | Social and Educational | Social care                    |
| 3311 NCOs and other ranks                              | Other essential worker | Police and protective services |
| 3312 Police officers (sergeant and below)              | Other essential worker | Police and protective services |
| 3313 Fire service officers (watch manager and below)   | Other essential worker | Police and protective services |

|      |                                                    |                        |                                |
|------|----------------------------------------------------|------------------------|--------------------------------|
| 3314 | Prison service officers (below principal officer)  | Other essential worker | Police and protective services |
| 3315 | Police community support officers                  | Other essential worker | Non essential                  |
| 3319 | Protective service associate professionals n.e.c.  | Other essential worker | Police and protective services |
| 3411 | Artists                                            | Non essential          | Non essential                  |
| 3412 | Authors, writers and translators                   | Non essential          | Non essential                  |
| 3413 | Actors, entertainers and presenters                | Non essential          | Non essential                  |
| 3414 | Dancers and choreographers                         | Non essential          | Non essential                  |
| 3415 | Musicians                                          | Non essential          | Non essential                  |
| 3416 | Arts officers, producers and directors             | Non essential          | Non essential                  |
| 3417 | Photographers, audio-visual and broadcasting eq    | Non essential          | Non essential                  |
| 3421 | Graphic designers                                  | Non essential          | Non essential                  |
| 3422 | Product, clothing and related designers            | Non essential          | Non essential                  |
| 3441 | Sports players                                     | Non essential          | Non essential                  |
| 3442 | Sports coaches, instructors and officials          | Non essential          | Non essential                  |
| 3443 | Fitness instructors                                | Non essential          | Non essential                  |
| 3511 | Air traffic controllers                            | Non essential          | Non essential                  |
| 3512 | Aircraft pilots and flight engineers               | Non essential          | Non essential                  |
| 3513 | Ship and hovercraft officers                       | Non essential          | Non essential                  |
| 3520 | Legal associate professionals                      | Non essential          | Non essential                  |
| 3531 | Estimators, valuers and assessors                  | Non essential          | Non essential                  |
| 3532 | Brokers                                            | Non essential          | Non essential                  |
| 3533 | Insurance underwriters                             | Non essential          | Non essential                  |
| 3534 | Finance and investment analysts and advisers       | Non essential          | Non essential                  |
| 3535 | Taxation experts                                   | Non essential          | Non essential                  |
| 3536 | Importers and exporters                            | Non essential          | Non essential                  |
| 3537 | Financial and accounting technicians               | Non essential          | Non essential                  |
| 3538 | Financial accounts managers                        | Non essential          | Non essential                  |
| 3539 | Business and related associate professionals n.e.c | Non essential          | Non essential                  |
| 3541 | Buyers and procurement officers                    | Non essential          | Non essential                  |
| 3542 | Business sales executives                          | Non essential          | Non essential                  |
| 3543 | Marketing associate professionals                  | Non essential          | Non essential                  |
| 3544 | Estate agents and auctioneers                      | Non essential          | Non essential                  |
| 3545 | Sales accounts and business development manag      | Non essential          | Non essential                  |

|      |                                                        |                    |               |
|------|--------------------------------------------------------|--------------------|---------------|
| 3546 | Conference and exhibition managers and organisers      | Non essential      | Non essential |
| 3550 | Conservation and environmental associate professionals | Non essential      | Non essential |
| 3561 | Public services associate professionals                | Non essential      | Non essential |
| 3562 | Human resources and industrial relations officers      | Non essential      | Non essential |
| 3563 | Vocational and industrial trainers and instructors     | Non essential      | Non essential |
| 3564 | Careers advisers and vocational guidance specialists   | Non essential      | Non essential |
| 3565 | Inspectors of standards and regulations                | Non essential      | Non essential |
| 3567 | Health and safety officers                             | Non essential      | Non essential |
| 4112 | National government administrative occupations         | Non essential      | Non essential |
| 4113 | Local government administrative occupations            | Non essential      | Non essential |
| 4114 | Officers of non-governmental organisations             | Non essential      | Non essential |
| 4121 | Credit controllers                                     | Non essential      | Non essential |
| 4122 | Book-keepers, payroll managers and wages clerks        | Non essential      | Non essential |
| 4123 | Bank and post office clerks                            | Non essential      | Non essential |
| 4124 | Finance officers                                       | Non essential      | Non essential |
| 4129 | Financial administrative occupations n.e.c.            | Non essential      | Non essential |
| 4131 | Records clerks and assistants                          | Non essential      | Non essential |
| 4132 | Pensions and insurance clerks and assistants           | Non essential      | Non essential |
| 4133 | Stock control clerks and assistants                    | Non essential      | Non essential |
| 4134 | Transport and distribution clerks and assistants       | Non essential      | Non essential |
| 4135 | Library clerks and assistants                          | Non essential      | Non essential |
| 4138 | Human resources administrative occupations             | Non essential      | Non essential |
| 4151 | Sales administrators                                   | Non essential      | Non essential |
| 4159 | Other administrative occupations n.e.c.                | Non essential      | Non essential |
| 4161 | Office managers                                        | Non essential      | Non essential |
| 4162 | Office supervisors                                     | Non essential      | Non essential |
| 4211 | Medical secretaries                                    | Healthcare Workers | Support staff |
| 4212 | Legal secretaries                                      | Non essential      | Non essential |
| 4213 | School secretaries                                     | Non essential      | Non essential |
| 4214 | Company secretaries                                    | Non essential      | Non essential |
| 4215 | Personal assistants and other secretaries              | Non essential      | Non essential |
| 4216 | Receptionists                                          | Non essential      | Non essential |
| 4217 | Typists and related keyboard occupations               | Non essential      | Non essential |

|                                                           |                        |                 |
|-----------------------------------------------------------|------------------------|-----------------|
| 5111 Farmers                                              | Other essential worker | Food production |
| 5112 Horticultural trades                                 | Other essential worker | Food production |
| 5113 Gardeners and landscape gardeners                    | Non essential          | Non essential   |
| 5114 Groundsmen and greenkeepers                          | Non essential          | Non essential   |
| 5119 Agricultural and fishing trades n.e.c.               | Other essential worker | Food production |
| 5211 Smiths and forge workers                             | Non essential          | Non essential   |
| 5212 Moulders, core makers and die casters                | Non essential          | Non essential   |
| 5213 Sheet metal workers                                  | Non essential          | Non essential   |
| 5214 Metal plate workers, and riveters                    | Non essential          | Non essential   |
| 5215 Welding trades                                       | Non essential          | Non essential   |
| 5216 Pipe fitters                                         | Non essential          | Non essential   |
| 5221 Metal machining setters and setter-operators         | Non essential          | Non essential   |
| 5222 Tool makers, tool fitters and markers-out            | Non essential          | Non essential   |
| 5223 Metal working production and maintenance fitter      | Non essential          | Non essential   |
| 5224 Precision instrument makers and repairers            | Non essential          | Non essential   |
| 5225 Air-conditioning and refrigeration engineers         | Non essential          | Non essential   |
| 5231 Vehicle technicians, mechanics and electricians      | Non essential          | Non essential   |
| 5232 Vehicle body builders and repairers                  | Non essential          | Non essential   |
| 5234 Vehicle paint technicians                            | Non essential          | Non essential   |
| 5235 Aircraft maintenance and related trades              | Non essential          | Non essential   |
| 5236 Boat and ship builders and repairers                 | Non essential          | Non essential   |
| 5237 Rail and rolling stock builders and repairers        | Non essential          | Non essential   |
| 5241 Electricians and electrical fitters                  | Non essential          | Non essential   |
| 5242 Telecommunications engineers                         | Non essential          | Non essential   |
| 5244 TV, video and audio engineers                        | Non essential          | Non essential   |
| 5245 IT engineers                                         | Non essential          | Non essential   |
| 5249 Electrical and electronic trades n.e.c.              | Non essential          | Non essential   |
| 5250 Skilled metal, electrical and electronic trades supr | Non essential          | Non essential   |
| 5311 Steel erectors                                       | Non essential          | Non essential   |
| 5312 Bricklayers and masons                               | Non essential          | Non essential   |
| 5313 Roofers, roof tilers and slaters                     | Non essential          | Non essential   |
| 5314 Plumbers and heating and ventilating engineers       | Non essential          | Non essential   |
| 5315 Carpenters and joiners                               | Non essential          | Non essential   |

|      |                                                  |                        |                              |
|------|--------------------------------------------------|------------------------|------------------------------|
| 5316 | Glaziers, window fabricators and fitters         | Non essential          | Non essential                |
| 5319 | Construction and building trades n.e.c.          | Non essential          | Non essential                |
| 5321 | Plasterers                                       | Non essential          | Non essential                |
| 5322 | Floorers and wall tilers                         | Non essential          | Non essential                |
| 5323 | Painters and decorators                          | Non essential          | Non essential                |
| 5330 | Construction and building trades supervisors     | Non essential          | Non essential                |
| 5411 | Weavers and knitters                             | Non essential          | Non essential                |
| 5412 | Upholsterers                                     | Non essential          | Non essential                |
| 5413 | Footwear and leather working trades              | Non essential          | Non essential                |
| 5414 | Tailors and dressmakers                          | Non essential          | Non essential                |
| 5419 | Textiles, garments and related trades n.e.c.     | Non essential          | Non essential                |
| 5421 | Pre-press technicians                            | Non essential          | Non essential                |
| 5422 | Printers                                         | Non essential          | Non essential                |
| 5423 | Print finishing and binding workers              | Non essential          | Non essential                |
| 5431 | Butchers                                         | Other essential worker | Food retail and distribution |
| 5432 | Bakers and flour confectioners                   | Other essential worker | Food retail and distribution |
| 5433 | Fishmongers and poultry dressers                 | Other essential worker | Food retail and distribution |
| 5434 | Chefs                                            | Non essential          | Non essential                |
| 5435 | Cooks                                            | Non essential          | Non essential                |
| 5436 | Catering and bar managers                        | Non essential          | Non essential                |
| 5441 | Glass and ceramics makers, decorators and finish | Non essential          | Non essential                |
| 5442 | Furniture makers and other craft woodworkers     | Non essential          | Non essential                |
| 5443 | Florists                                         | Non essential          | Non essential                |
| 5449 | Other skilled trades n.e.c.                      | Non essential          | Non essential                |
| 6121 | Nursery nurses and assistants                    | Social and educational | Education                    |
| 6122 | Childminders and related occupations             | Non essential          | Non essential                |
| 6123 | Playworkers                                      | Non essential          | Non essential                |
| 6125 | Teaching assistants                              | Non essential          | Education                    |
| 6126 | Educational support assistants                   | Social and educational | Non essential                |
| 6131 | Veterinary nurses                                | Non essential          | Non essential                |
| 6132 | Pest control officers                            | Non essential          | Non essential                |
| 6139 | Animal care services occupations n.e.c.          | Non essential          | Non essential                |
| 6141 | Nursing auxiliaries and assistants               | Healthcare workers     | Support staff                |



|                                                         |                        |                                |
|---------------------------------------------------------|------------------------|--------------------------------|
| 6142 Ambulance staff (excluding paramedics)             | Healthcare workers     | Support staff                  |
| 6143 Dental nurses                                      | Non essential          | Health associate professionals |
| 6144 Houseparents and residential wardens               | Healthcare workers     | Social care                    |
| 6145 Care workers and home carers                       | Healthcare workers     | Social care                    |
| 6146 Senior care workers                                | Non essential          | Social care                    |
| 6147 Care escorts                                       | Non essential          | Social care                    |
| 6148 Undertakers, mortuary and crematorium assistants   | Social and educational | Social care                    |
| 6211 Sports and leisure assistants                      | Non essential          | Non essential                  |
| 6212 Travel agents                                      | Non essential          | Non essential                  |
| 6214 Air travel assistants                              | Non essential          | Non essential                  |
| 6215 Rail travel assistants                             | Other essential worker | Other transport workers        |
| 6219 Leisure and travel service occupations n.e.c.      | Non essential          | Non essential                  |
| 6221 Hairdressers and barbers                           | Non essential          | Non essential                  |
| 6222 Beauticians and related occupations                | Non essential          | Non essential                  |
| 6231 Housekeepers and related occupations               | Non essential          | Non essential                  |
| 6232 Caretakers                                         | Social and educational | Social care                    |
| 6240 Cleaning and housekeeping managers and supervisors | Non essential          | Non essential                  |
| 7111 Sales and retail assistants                        | Other essential worker | Food retail and distribution   |
| 7112 Retail cashiers and check-out operators            | Other essential worker | Food retail and distribution   |
| 7113 Telephone salespersons                             | Non essential          | Non essential                  |
| 7114 Pharmacy and other dispensing assistants           | Non essential          | Support staff                  |
| 7115 Vehicle and parts salespersons and advisers        | Non essential          | Non essential                  |
| 7121 Collector salespersons and credit agents           | Non essential          | Non essential                  |
| 7122 Debt, rent and other cash collectors               | Non essential          | Non essential                  |
| 7123 Roundspersons and van salespersons                 | Non essential          | Non essential                  |
| 7124 Market and street traders and assistants           | Non essential          | Non essential                  |
| 7125 Merchandisers and window dressers                  | Non essential          | Non essential                  |
| 7129 Sales related occupations n.e.c.                   | Non essential          | Non essential                  |
| 7130 Sales supervisors                                  | Non essential          | Non essential                  |
| 7211 Call and contact centre occupations                | Non essential          | Non essential                  |
| 7213 Telephonists                                       | Non essential          | Non essential                  |
| 7214 Communication operators                            | Non essential          | Non essential                  |
| 7215 Market research interviewers                       | Non essential          | Non essential                  |

|                                                      |                        |                         |
|------------------------------------------------------|------------------------|-------------------------|
| 7219 Customer service occupations n.e.c.             | Non essential          | Non essential           |
| 7220 Customer service managers and supervisors       | Non essential          | Non essential           |
| 8111 Food, drink and tobacco process operatives      | Other essential worker | Food production         |
| 8112 Glass and ceramics process operatives           | Non essential          | Non essential           |
| 8113 Textile process operatives                      | Non essential          | Non essential           |
| 8114 Chemical and related process operatives         | Non essential          | Non essential           |
| 8115 Rubber process operatives                       | Non essential          | Non essential           |
| 8116 Plastics process operatives                     | Non essential          | Non essential           |
| 8117 Metal making and treating process operatives    | Non essential          | Non essential           |
| 8118 Electroplaters                                  | Non essential          | Non essential           |
| 8119 Process operatives n.e.c.                       | Non essential          | Non essential           |
| 8121 Paper and wood machine operatives               | Non essential          | Non essential           |
| 8122 Coal mine operatives                            | Non essential          | Non essential           |
| 8123 Quarry workers and related operatives           | Non essential          | Non essential           |
| 8124 Energy plant operatives                         | Non essential          | Non essential           |
| 8125 Metal working machine operatives                | Non essential          | Non essential           |
| 8126 Water and sewerage plant operatives             | Non essential          | Non essential           |
| 8127 Printing machine assistants                     | Non essential          | Non essential           |
| 8129 Plant and machine operatives n.e.c.             | Non essential          | Non essential           |
| 8131 Assemblers (electrical and electronic products) | Non essential          | Non essential           |
| 8132 Assemblers (vehicles and metal goods)           | Non essential          | Non essential           |
| 8133 Routine inspectors and testers                  | Non essential          | Non essential           |
| 8134 Weighers, graders and sorters                   | Non essential          | Non essential           |
| 8135 Tyre, exhaust and windscreen fitters            | Non essential          | Non essential           |
| 8137 Sewing machinists                               | Non essential          | Non essential           |
| 8139 Assemblers and routine operatives n.e.c.        | Non essential          | Non essential           |
| 8141 Scaffolders, staggers and riggers               | Non essential          | Non essential           |
| 8142 Road construction operatives                    | Non essential          | Non essential           |
| 8143 Rail construction and maintenance operatives    | Non essential          | Non essential           |
| 8149 Construction operatives n.e.c.                  | Non essential          | Non essential           |
| 8211 Large goods vehicle drivers                     | Other essential worker | Other transport workers |
| 8212 Van drivers                                     | Other essential worker | Van drivers             |
| 8213 Bus and coach drivers                           | Other essential worker | Bus and coach drivers   |

|                                                       |                        |                                     |
|-------------------------------------------------------|------------------------|-------------------------------------|
| 8214 Taxi and cab drivers and chauffeurs              | Other essential worker | Taxi and cab drivers and chauffeurs |
| 8215 Driving instructors                              | Non essential          | Non essential                       |
| 8221 Crane drivers                                    | Non essential          | Non essential                       |
| 8222 Fork-lift truck drivers                          | Non essential          | Non essential                       |
| 8223 Agricultural machinery drivers                   | Non essential          | Non essential                       |
| 8229 Mobile machine drivers and operatives n.e.c.     | Non essential          | Non essential                       |
| 8231 Train and tram drivers                           | Other essential worker | Other transport workers             |
| 8232 Marine and waterways transport operatives        | Non essential          | Non essential                       |
| 8233 Air transport operatives                         | Non essential          | Non essential                       |
| 8234 Rail transport operatives                        | Other essential worker | Other transport workers             |
| 8239 Other drivers and transport operatives n.e.c.    | Non essential          | Non essential                       |
| 9111 Farm workers                                     | Other essential worker | Food production                     |
| 9112 Forestry workers                                 | Non essential          | Non essential                       |
| 9119 Fishing and other elementary agriculture occupat | Other essential worker | Food production                     |
| 9120 Elementary construction occupations              | Non essential          | Non essential                       |
| 9132 Industrial cleaning process occupations          | Non essential          | Non essential                       |
| 9134 Packers, bottlers, canners and fillers           | Non essential          | Non essential                       |
| 9139 Elementary process plant occupations n.e.c.      | Non essential          | Non essential                       |
| 9211 Postal workers, mail sorters, messengers and cou | Other essential worker | Other transport workers             |
| 9219 Elementary administration occupations n.e.c.     | Non essential          | Non essential                       |
| 9231 Window cleaners                                  | Other essential worker | Sanitary workers                    |
| 9232 Street cleaners                                  | Other essential worker | Sanitary workers                    |
| 9233 Cleaners and domestics                           | Other essential worker | Sanitary workers                    |
| 9234 Launderers, dry cleaners and pressers            | Non essential          | Non essential                       |
| 9235 Refuse and salvage occupations                   | Other essential worker | Sanitary workers                    |
| 9236 Vehicle valeters and cleaners                    | Non essential          | Non essential                       |
| 9239 Elementary cleaning occupations n.e.c.           | Other essential worker | Sanitary workers                    |
| 9241 Security guards and related occupations          | Non essential          | Non essential                       |
| 9242 Parking and civil enforcement occupations        | Non essential          | Non essential                       |
| 9244 School midday and crossing patrol occupations    | Non essential          | Non essential                       |
| 9249 Elementary security occupations n.e.c.           | Non essential          | Non essential                       |
| 9251 Shelf fillers                                    | Other essential worker | Food retail and distribution        |
| 9259 Elementary sales occupations n.e.c.              | Other essential worker | Food retail and distribution        |

|                                                   |                        |               |
|---------------------------------------------------|------------------------|---------------|
| 9260 Elementary storage occupations               | Non essential          | Non essential |
| 9271 Hospital porters                             | Other essential worker | Support staff |
| 9272 Kitchen and catering assistants              | Non essential          | Non essential |
| 9273 Waiters and waitresses                       | Non essential          | Non essential |
| 9274 Bar staff                                    | Non essential          | Non essential |
| 9275 Leisure and theme park attendants            | Non essential          | Non essential |
| 9279 Other elementary services occupations n.e.c. | Non essential          | Non essential |
